# Supplementary material for: Preparation of aminated chitosan microspheres by one-pot method and their adsorption properties for dye wastewater
Source: R Soc Open Sci. 2019 May 15;6(5):182226. doi: 10.1098/rsos.182226 (PMC6549955; doi:10.1098/rsos.182226)
Supplement: BET report of PEI-CTSms [file rsos182226supp2.xls]

## Sheet: MJ-1-1
				|						|					|					|					|					|					|					|
ASAP 2020 V4.03 (V4.03 J)	Unit 1	Serial #: 2183	Page 1	|	ASAP 2020 V4.03 (V4.03 J)	Unit 1	Serial #: 2183	Page 1		|	ASAP 2020 V4.03 (V4.03 J)	Unit 1	Serial #: 2183	Page 1	|	ASAP 2020 V4.03 (V4.03 J)	Unit 1	Serial #: 2183	Page 1	|	ASAP 2020 V4.03 (V4.03 J)	Unit 1	Serial #: 2183	Page 1	|	ASAP 2020 V4.03 (V4.03 J)	Unit 1	Serial #: 2183	Page 1	|	ASAP 2020 V4.03 (V4.03 J)	Unit 1	Serial #: 2183	Page 1	|	ASAP 2020 V4.03 (V4.03 J)	Unit 1	Serial #: 2183	Page 1	|	ASAP 2020 V4.03 (V4.03 J)	Unit 1	Serial #: 2183	Page 1
				|						|					|					|					|					|					|					|
				|						|					|					|					|					|					|					|
Sample:	MJ-PEI-CTSms			|	Sample:	MJ-PEI-CTSms				|	Sample:	MJ-PEI-CTSms			|	Sample:	MJ-PEI-CTSms			|	Sample:	MJ-PEI-CTSms			|	Sample:	MJ-PEI-CTSms			|	Sample:	MJ-PEI-CTSms			|	Sample:	MJ-PEI-CTSms			|	Sample:	MJ-PEI-CTSms
Operator:	dhb			|	Operator:	dhb				|	Operator:	dhb			|	Operator:	dhb			|	Operator:	dhb			|	Operator:	dhb			|	Operator:	dhb			|	Operator:	dhb			|	Operator:	dhb
Submitter:				|	Submitter:					|	Submitter:				|	Submitter:				|	Submitter:				|	Submitter:				|	Submitter:				|	Submitter:				|	Submitter:
File:	D:\2020\DATA\2018\4\MJ-PEI-CTSms.SMP			|	File:	D:\2020\DATA\2018\4\MJ-PEI-CTSms.SMP				|	File:	D:\2020\DATA\2018\4\MJ-PEI-CTSms.SMP			|	File:	D:\2020\DATA\2018\4\MJ-PEI-CTSms.SMP			|	File:	D:\2020\DATA\2018\4\MJ-PEI-CTSms.SMP			|	File:	D:\2020\DATA\2018\4\MJ-PEI-CTSms.SMP			|	File:	D:\2020\DATA\2018\4\MJ-PEI-CTSms.SMP			|	File:	D:\2020\DATA\2018\4\MJ-PEI-CTSms.SMP			|	File:	D:\2020\DATA\2018\4\MJ-PEI-CTSms.SMP
				|						|					|					|					|					|					|					|
				|						|					|					|					|					|					|					|
Started:	7/28/2018 2:04:00PM	Analysis Adsorptive:	N2	|	Started:	7/28/2018 2:04:00PM	Analysis Adsorptive:	N2		|	Started:	7/28/2018 2:04:00PM	Analysis Adsorptive:	N2	|	Started:	7/28/2018 2:04:00PM	Analysis Adsorptive:	N2	|	Started:	7/28/2018 2:04:00PM	Analysis Adsorptive:	N2	|	Started:	7/28/2018 2:04:00PM	Analysis Adsorptive:	N2	|	Started:	7/28/2018 2:04:00PM	Analysis Adsorptive:	N2	|	Started:	7/28/2018 2:04:00PM	Analysis Adsorptive:	N2	|	Started:	7/28/2018 2:04:00PM	Analysis Adsorptive:	N2
Completed:	7/28/2018 4:36:33PM	Analysis Bath Temp.:	-195.709 癈	|	Completed:	7/28/2018 4:36:33PM	Analysis Bath Temp.:	-195.709 癈		|	Completed:	7/28/2018 4:36:33PM	Analysis Bath Temp.:	-195.709 癈	|	Completed:	7/28/2018 4:36:33PM	Analysis Bath Temp.:	-195.709 癈	|	Completed:	7/28/2018 4:36:33PM	Analysis Bath Temp.:	-195.709 癈	|	Completed:	7/28/2018 4:36:33PM	Analysis Bath Temp.:	-195.709 癈	|	Completed:	7/28/2018 4:36:33PM	Analysis Bath Temp.:	-195.709 癈	|	Completed:	7/28/2018 4:36:33PM	Analysis Bath Temp.:	-195.709 癈	|	Completed:	7/28/2018 4:36:33PM	Analysis Bath Temp.:	-195.709 癈
Report Time:	8/5/2018 1:46:38AM	Thermal Correction:	No	|	Report Time:	8/5/2018 1:46:38AM	Thermal Correction:	No		|	Report Time:	8/5/2018 1:46:38AM	Thermal Correction:	No	|	Report Time:	8/5/2018 1:46:38AM	Thermal Correction:	No	|	Report Time:	8/5/2018 1:46:38AM	Thermal Correction:	No	|	Report Time:	8/5/2018 1:46:38AM	Thermal Correction:	No	|	Report Time:	8/5/2018 1:46:38AM	Thermal Correction:	No	|	Report Time:	8/5/2018 1:46:38AM	Thermal Correction:	No	|	Report Time:	8/5/2018 1:46:38AM	Thermal Correction:	No
Sample Mass:	0.1071 g	Warm Free Space:	27.0121 cm?Measured	|	Sample Mass:	0.1071 g	Warm Free Space:	27.0121 cm?Measured		|	Sample Mass:	0.1071 g	Warm Free Space:	27.0121 cm?Measured	|	Sample Mass:	0.1071 g	Warm Free Space:	27.0121 cm?Measured	|	Sample Mass:	0.1071 g	Warm Free Space:	27.0121 cm?Measured	|	Sample Mass:	0.1071 g	Warm Free Space:	27.0121 cm?Measured	|	Sample Mass:	0.1071 g	Warm Free Space:	27.0121 cm?Measured	|	Sample Mass:	0.1071 g	Warm Free Space:	27.0121 cm?Measured	|	Sample Mass:	0.1071 g	Warm Free Space:	27.0121 cm?Measured
Cold Free Space:	82.9712 cm	Equilibration Interval:	10 s	|	Cold Free Space:	82.9712 cm	Equilibration Interval:	10 s		|	Cold Free Space:	82.9712 cm	Equilibration Interval:	10 s	|	Cold Free Space:	82.9712 cm	Equilibration Interval:	10 s	|	Cold Free Space:	82.9712 cm	Equilibration Interval:	10 s	|	Cold Free Space:	82.9712 cm	Equilibration Interval:	10 s	|	Cold Free Space:	82.9712 cm	Equilibration Interval:	10 s	|	Cold Free Space:	82.9712 cm	Equilibration Interval:	10 s	|	Cold Free Space:	82.9712 cm	Equilibration Interval:	10 s
Ambient Temperature:	22.00 癈	Low Pressure Dose:	None	|	Ambient Temperature:	22.00 癈	Low Pressure Dose:	None		|	Ambient Temperature:	22.00 癈	Low Pressure Dose:	None	|	Ambient Temperature:	22.00 癈	Low Pressure Dose:	None	|	Ambient Temperature:	22.00 癈	Low Pressure Dose:	None	|	Ambient Temperature:	22.00 癈	Low Pressure Dose:	None	|	Ambient Temperature:	22.00 癈	Low Pressure Dose:	None	|	Ambient Temperature:	22.00 癈	Low Pressure Dose:	None	|	Ambient Temperature:	22.00 癈	Low Pressure Dose:	None
Automatic Degas:	Yes			|	Automatic Degas:	Yes				|	Automatic Degas:	Yes			|	Automatic Degas:	Yes			|	Automatic Degas:	Yes			|	Automatic Degas:	Yes			|	Automatic Degas:	Yes			|	Automatic Degas:	Yes			|	Automatic Degas:	Yes
				|						|					|					|					|					|					|					|
				|						|					|					|					|					|					|					|
				|						|					|					|					|					|					|					|
				|						|					|					|					|					|					|					|
				|						|					|					|					|					|					|					|
				|						|					|					|					|					|					|					|
				|						|					|					|					|					|					|					|
Summary Report				|	Isotherm Tabular Report					|	Isotherm Linear Plot				|	Isotherm Log Plot				|	Isotherm Linear Absolute Plot				|	Isotherm Log Absolute Plot				|	Isotherm Pressure Composition				|	BET Reports				|	Langmuir Reports
				|						|					|					|					|					|					|					|
				|	Relative Pressure (p/p?	Absolute Pressure (mbar)	Quantity Adsorbed (mmol/g)	Elapsed Time (h:min)	Saturation Pressure (mbar)	|					|					|					|					|					|	Primary Data				|	Primary Data
				|				00:52	1023.89	|	MJ-PEI-CTSms - Adsorption				|	MJ-PEI-CTSms - Adsorption				|	MJ-PEI-CTSms - Adsorption				|	MJ-PEI-CTSms - Adsorption				|	MJ-PEI-CTSms - Adsorption				|	1089- Fewer than 2 points available for BET calculations.				|	4052- Fewer than two points are selected for this report.
No summary reports could be produced.				|	0.0582885	59.681	-0.00274317	01:02		|	Relative Pressure (p/p?	Quantity Adsorbed (mmol/g)			|	Relative Pressure (p/p?	Quantity Adsorbed (mmol/g)			|	Absolute Pressure (mbar)	Quantity Adsorbed (mmol/g)			|	Absolute Pressure (mbar)	Quantity Adsorbed (mmol/g)			|	Weight % N2	Absolute Pressure (mbar)			|	1023- Preparations failed in primary data.				|	Primary Data
				|	0.090266	92.4224	-0.00682926	01:04		|	0.0582885	-0.00274317			|	0.0582885	-0.00274317			|	59.681	-0.00274317			|	59.681	-0.00274317			|	-0.000548634	59.681			|	1089- Fewer than 2 points available for BET calculations.				|	4052- Fewer than two points are selected for this report.
				|	0.118157	120.98	-0.011062	01:06		|	0.090266	-0.00682926			|	0.090266	-0.00682926			|	92.4224	-0.00682926			|	92.4224	-0.00682926			|	-0.00136585	92.4224			|	1023- Preparations failed in primary data.				|
				|	0.146088	149.578	-0.0159662	01:08		|	0.118157	-0.011062			|	0.118157	-0.011062			|	120.98	-0.011062			|	120.98	-0.011062			|	-0.0022124	120.98			|	1089- Fewer than 2 points available for BET calculations.				|
				|	0.170726	174.804	-0.0206553	01:11		|	0.146088	-0.0159662			|	0.146088	-0.0159662			|	149.578	-0.0159662			|	149.578	-0.0159662			|	-0.00319325	149.578			|	1023- Preparations failed in primary data.				|
				|	0.194896	199.552	-0.0247427	01:13		|	0.170726	-0.0206553			|	0.170726	-0.0206553			|	174.804	-0.0206553			|	174.804	-0.0206553			|	-0.00413107	174.804			|	1089- Fewer than 2 points available for BET calculations.				|
				|	0.219115	224.35	-0.0308984	01:15		|	0.194896	-0.0247427			|	0.194896	-0.0247427			|	199.552	-0.0247427			|	199.552	-0.0247427			|	-0.00494853	199.552			|	1023- Preparations failed in primary data.				|
				|						|	0.219115	-0.0308984			|	0.219115	-0.0308984			|	224.35	-0.0308984			|	224.35	-0.0308984			|	-0.00617968	224.35			|	1089- Fewer than 2 points available for BET calculations.				|
				|						|					|					|					|					|					|	1023- Preparations failed in primary data.				|
																																			|					|
																																			|					|
